# Supplementary material for: Psychometric properties of the Hungarian version of the eHealth Literacy Scale
Source: Springer Nature journal article supplement (doi:10.1007/s10198-019-01062-1), 2019-05-16
Supplement: MOESM1 [file 16728822]

## **Psychometric properties of the Hungarian version of the eHealth Literacy Scale**

### **Authors:**

Zsombor Zrubka, Ottó Hajdu, Fanni Rencz, Petra Baji, László Gulácsi, Márta Péntek

### **Correspondence:**

Zsombor Zrubka, Department of Health Economics, Corvinus University of Budapest, Fővám tér 8., H-1093 Budapest, Hungary e-mail: [zsombor.zrubka@uni-corvinus.hu](mailto:zsombor.zrubka@uni-corvinus.hu) ; phone: +36-1-482-5308

**Journal:** The European Journal of Health Economics

## Supplementary Material S1: eHealth Literacy Scale

© Cameron D. Norman, Harvey A. Skinner

Used with permission under the Creative Commons 2.0 license (<http://www.creativecommons.org/licenses/by/2.0/>)

Norman CD, Skinner HA. eHEALS: The eHealth Literacy Scale. *J Med Internet Res*. 2006;8(4):e27. Published 2006 Nov 14.

doi:10.2196/jmir.8.4.e27

**I would like to ask you for your opinion and about your experience using the Internet for health information. For each statement, tell me which response best reflects your opinion and experience *right now*.**

1. How **useful** do you feel the Internet is in helping you in making decisions about your health?

|                            |                            |                            |                            |                            |
|----------------------------|----------------------------|----------------------------|----------------------------|----------------------------|
| <input type="checkbox"/> 1 | <input type="checkbox"/> 2 | <input type="checkbox"/> 3 | <input type="checkbox"/> 4 | <input type="checkbox"/> 5 |
| Not useful at all          | Not useful                 | Unsure                     | Useful                     | Very Useful                |

2. How **important** is it for you to be able to access health resources on the Internet?

|                            |                            |                            |                            |                            |
|----------------------------|----------------------------|----------------------------|----------------------------|----------------------------|
| <input type="checkbox"/> 1 | <input type="checkbox"/> 2 | <input type="checkbox"/> 3 | <input type="checkbox"/> 4 | <input type="checkbox"/> 5 |
| Not important at all       | Not important              | Unsure                     | Important                  | Very important             |

3. I know **what** health resources are available on the Internet

- 1)  Strongly Disagree
- 2)  Disagree
- 3)  Undecided
- 4)  Agree
- 5)  Strongly Agree

4. I know **where** to find helpful health resources on the Internet

- 1)  Strongly Disagree
- 2)  Disagree
- 3)  Undecided
- 4)  Agree
- 5)  Strongly Agree

5. I know **how** to find helpful health resources on the Internet

- 1)  Strongly Disagree
- 2)  Disagree
- 3)  Undecided
- 4)  Agree
- 5)  Strongly Agree

6. I know **how to use** the Internet to answer my questions about health

- 1)  Strongly Disagree
- 2)  Disagree
- 3)  Undecided
- 4)  Agree
- 5)  Strongly Agree

7. I know how to use **the health information** I find on the Internet to help me

- 1)  Strongly Disagree
- 2)  Disagree
- 3)  Undecided
- 4)  Agree
- 5)  Strongly Agree

8. I have the skills I need to **evaluate** the health resources I find on the Internet

- 1)  Strongly Disagree
- 2)  Disagree
- 3)  Undecided
- 4)  Agree
- 5)  Strongly Agree

9. I can tell **high quality** health resources from **low quality** health resources on the Internet

- 1)  Strongly Disagree
- 2)  Disagree
- 3)  Undecided
- 4)  Agree
- 5)  Strongly Agree

10. I feel **confident** in using information from the Internet to make health decisions

- 1)  Strongly Disagree
- 2)  Disagree
- 3)  Undecided
- 4)  Agree
- 5)  Strongly Agree

***Thank you!***

*\* Note: Questions #1 and #2 are recommended as supplementary items for use with the eHEALS to understand consumer's interest in using eHealth in general. These items are not a formal part of the eHealth Literacy scale, which comprises questions #3-10.*

## Magyar nyelvű Elektronikus Egészségműveltség Skála (Hungarian version of the eHealth Literacy Scale, eHEALS)

© Zrubka Zsombor, Hajdu Ottó, Rencz Fanni, Baji Petra, Gulácsi László, Péntek Márta  
Szabadon felhasználható a Creative Commons Attribution 4.0 International License (<https://creativecommons.org/>) értelmében a doi:10.1007/s10198-019-01062-1 azonosítóval ellátott közlemény referenciájának pontos megjelölésével.

A következő kérdésekkel az egészséggel kapcsolatos internethasználatról szeretnénk a véleményét és a tapasztalatait megismerni. Kérjük, mindegyik kérdésnél azt a választ jelölje, amelyik a *jelen pillanatban* a leginkább jellemző Önre.

1. Mennyire jelent **hasznos** segítséget Önnek az internet az egészségét érintő döntések során?

|                            |                            |                            |                            |                            |
|----------------------------|----------------------------|----------------------------|----------------------------|----------------------------|
| <input type="checkbox"/> 1 | <input type="checkbox"/> 2 | <input type="checkbox"/> 3 | <input type="checkbox"/> 4 | <input type="checkbox"/> 5 |
| Egyáltalán nem hasznos     | Nem hasznos                | Nem tudom                  | Hasznos                    | Nagyon hasznos             |

2. Mennyire **fontos** Önnek, hogy hozzáférjen egészséggel kapcsolatos információforrásokhoz az interneten?

|                            |                            |                            |                            |                            |
|----------------------------|----------------------------|----------------------------|----------------------------|----------------------------|
| <input type="checkbox"/> 1 | <input type="checkbox"/> 2 | <input type="checkbox"/> 3 | <input type="checkbox"/> 4 | <input type="checkbox"/> 5 |
| Egyáltalán nem fontos      | Nem fontos                 | Nem tudom                  | Fontos                     | Nagyon fontos              |

3. Tudom, hogy **milyen** egészséggel kapcsolatos információforrások érhetők el az interneten

- 1)  Egyáltalán nem értek egyet
- 2)  Nem értek egyet
- 3)  Egyet is értek meg nem is
- 4)  Egyetértek
- 5)  Teljesen egyetértek

4. Tudom, hogy **hol** található az interneten az egészséggel kapcsolatos hasznos információforrások.

- 1)  Egyáltalán nem értek egyet
- 2)  Nem értek egyet
- 3)  Egyet is értek meg nem is
- 4)  Egyetértek
- 5)  Teljesen egyetértek

5. Tudom, **hogyan** kell az interneten keresni az egészséggel kapcsolatos hasznos információforrásokat.

- 1)  Egyáltalán nem értek egyet
- 2)  Nem értek egyet
- 3)  Egyet is értek meg nem is
- 4)  Egyetértek
- 5)  Teljesen egyetértek

6. Tudom, **hogyan használjam** az internetet, ha az egészséggel kapcsolatos kérdéseimet akarom megválaszolni

- 1)  Egyáltalán nem értek egyet
- 2)  Nem értek egyet
- 3)  Egyet is értek meg nem is
- 4)  Egyetértek
- 5)  Teljesen egyetértek

7. Tudom, **hogyan hasznosítsam** az interneten talált egészséggel kapcsolatos információkat

- 1)  Egyáltalán nem értek egyet
- 2)  Nem értek egyet
- 3)  Egyet is értek meg nem is
- 4)  Egyetértek
- 5)  Teljesen egyetértek

8. Megvan a szükséges tudásom, hogy **minősítsem** az interneten talált egészséggel kapcsolatos információforrásokat.

- 1)  Egyáltalán nem értek egyet
- 2)  Nem értek egyet
- 3)  Egyet is értek meg nem is
- 4)  Egyetértek
- 5)  Teljesen egyetértek

9. Meg tudom egymástól különböztetni az interneten található **jó és rossz minőségű** egészséggel kapcsolatos információforrásokat

- 1)  Egyáltalán nem értek egyet
- 2)  Nem értek egyet
- 3)  Egyet is értek meg nem is
- 4)  Egyetértek
- 5)  Teljesen egyetértek

10. Úgy érzem, **magabiztosan** használom az internetről származó információkat az egészséggel kapcsolatos döntéseim során

- 1)  Egyáltalán nem értek egyet
- 2)  Nem értek egyet
- 3)  Egyet is értek meg nem is
- 4)  Egyetértek
- 5)  Teljesen egyetértek

***Köszönjük!***

*\* Megjegyzés: az 1. és 2. kérdések az eHEALS kiegészítői annak érdekében, hogy megértsük a válaszadó e-egészségüggyel kapcsolatos általános érdeklődését. Ezek a kérdések nem képezik az eHEALS részét, amely a 3-10. kérdésekből áll.*
